# Supplementary material for: Demographic controls of future global fire risk
Source: Springer Nature journal article supplement (doi:10.1038/nclimate2999), 2016-05-02
Supplement: 41558_2016_BFnclimate2999_MOESM80_ESM.pdf [file 41558_2016_BFnclimate2999_MOESM80_ESM.pdf]

# Demographic controls of future global fire risk

W. Knorr, A. Arneth, L. Jiang

| <i>Modelling Group</i>                                                                                                                           | <i>Model Name</i> |
|--------------------------------------------------------------------------------------------------------------------------------------------------|-------------------|
| Centre National de Recherches<br>Météorologiques / Centre Européen de<br>Recherche et Formation Avancée en Calcul<br>Scientifique                | CNRM-CM5          |
| Commonwealth Scientific and Industrial<br>Research Organization in collaboration<br>with Queensland CSIRO Climate Change<br>Centre of Excellence | CSIRO-Mk3.6       |
| EC-EARTH consortium                                                                                                                              | EC-EARTH          |
| Institut Pierre-Simon Laplace                                                                                                                    | IPSL-CM5A-MR      |
| Max Planck Institute for Meteorology                                                                                                             | MPI-ESM-LR        |
| Met Office Hadley Centre                                                                                                                         | HadGEM2-ES        |
| NASA Goddard Institute for Space Studies                                                                                                         | GISS-E2-R         |
| National Center for Atmospheric Research                                                                                                         | CCSM4             |

Table S2. Optimised SIMFIRE parameters and rules of assignment for land cover classes \*

| Parameter | Land cover class                            | Value   | Condition 1                      | Condition 2               | Condition 3                    |
|-----------|---------------------------------------------|---------|----------------------------------|---------------------------|--------------------------------|
| $a_1$     | Cropland/Urban/Natural<br>Vegetation Mosaic | 0.110   |                                  | Class not used            |                                |
| $a_2$     | Needleleaf forest                           | 0.095   | $f_s/f_w < 0.8$ and $f \geq 0.1$ | $f_g/f < 0.4$             | $f_n/f \geq 0.6$               |
| $a_3$     | Broadleaf forest                            | 0.092   | $f_s/f_w < 0.8$ and $f \geq 0.1$ | $f_g/f < 0.4$             | $f_b/f \geq 0.6$               |
| $a_4$     | Mixed forest                                | 0.127   | $f_s/f_w < 0.8$ and $f \geq 0.1$ | $f_g/f < 0.4$             | $f_n/f < 0.6$ or $f_b/f < 0.6$ |
| $a_5$     | Shrubland                                   | 0.470   | $f_s/f_w \geq 0.8$               | $ \lambda  \leq 50^\circ$ | -                              |
| $a_6$     | Savanna or Grassland                        | 0.889   | $f_s/f_w < 0.8$ and $f \geq 0.1$ | $f_g/f \geq 0.4$          | -                              |
| $a_7$     | Tundra                                      | 0.059   | $f < 0.1$ or $f_s/f_w \geq 0.8$  | $ \lambda  > 50^\circ$    | -                              |
| $a_8$     | Barren or Sparsely<br>Vegetated             | 0.113   | $f < 0.1$                        | $ \lambda  \leq 50^\circ$ | -                              |
| $b$       | Global                                      | 0.905   |                                  |                           |                                |
| $c$       | Global                                      | 0.860   |                                  |                           |                                |
| $e$       | Global [km <sup>2</sup> /inhabitants]       | -0.0168 |                                  |                           |                                |

$f$ : potential FAPAR of all individuals within a grid cell  
 $f_w$ : potential FAPAR of woody individuals within a grid cell.  
 $f_s$ : potential FAPAR of woody individuals with less than 2 m height within a grid cell (shrubs).  
 $f_g$ : potential FAPAR of all grasses within a grid cell  
 $f_n$ : potential FAPAR of all needle-leaved individuals within a grid cell with at least 2 m height.  
 $f_b$ : potential FAPAR of all broad-leaved individuals within a grid cell with at least 2 m height.  
 $\lambda$ : geographical latitude of the centre of the grid cell.  
 \* All conditions are to be met, unless marked "-"

Table S3: Simulated burned area [ $10^6$  km<sup>2</sup>] for the globe or for densely populated areas for different world regions.

| RCP                | Population                          | Urbanization   | Case | Total burned area  |                    |                     | Only areas with > 30 inhab. / km <sup>2</sup> |     |      |
|--------------------|-------------------------------------|----------------|------|--------------------|--------------------|---------------------|-----------------------------------------------|-----|------|
|                    |                                     |                |      | SSA <sup>(1)</sup> | ANL <sup>(2)</sup> | NEFA <sup>(3)</sup> | SSA                                           | ANL | NEFA |
| -                  | Historical <sup>(4)</sup>           |                | -    | 1748               | 885                | 797                 | 101                                           | 55  | 13   |
| 4.5 <sup>(5)</sup> | SSP5 (low)                          | SSP5 (fast)    | 1    | 1264               | 1001               | 892                 | 92                                            | 53  | 15   |
|                    | SSP2 (medium)                       | SSP5 (fast)    | 2    | 1172               | 975                | 898                 | 118                                           | 56  | 18   |
|                    | SSP2 (medium)                       | SSP2 (central) | 3    | 1047               | 945                | 894                 | 146                                           | 68  | 18   |
|                    | SSP2 (medium)                       | SSP3 (slow)    | 4    | 941                | 911                | 890                 | 179                                           | 80  | 18   |
|                    | SSP3 (high)                         | SSP3 (slow)    | 5    | 837                | 867                | 894                 | 194                                           | 76  | 21   |
| 8.5                | SSP5 (low)                          | SSP5 (fast)    | 1    | 1227               | 1185               | 1013                | 78                                            | 61  | 19   |
|                    | SSP2 (medium)                       | SSP5 (fast)    | 2    | 1142               | 1155               | 1019                | 104                                           | 64  | 22   |
|                    | SSP2 (medium)                       | SSP2 (central) | 3    | 1027               | 1121               | 1015                | 131                                           | 78  | 22   |
|                    | SSP2 (medium)                       | SSP3 (slow)    | 4    | 929                | 1084               | 1009                | 162                                           | 92  | 23   |
|                    | SSP3 (high)                         | SSP3 (slow)    | 5    | 831                | 1032               | 1016                | 174                                           | 87  | 25   |
| 4.5                | Change of SSP5 to SSP2 population   |                | 2-1  | -92                | -26                | 5                   | 26                                            | 3   | 3    |
|                    | Change of SSP5 to SSP2 urbanisation |                | 3-2  | -125               | -30                | -3                  | 28                                            | 12  | 0    |
|                    | Change of SSP2 to SSP3 urbanisation |                | 4-3  | -107               | -33                | -5                  | 33                                            | 13  | 0    |
|                    | Change of SSP2 to SSP3 population   |                | 5-4  | -103               | -45                | 4                   | 15                                            | -4  | 3    |
| 8.5                | Change of SSP5 to SSP2 population   |                | 2-1  | -84                | -30                | 6                   | 26                                            | 3   | 4    |
|                    | Change of SSP5 to SSP2 urbanisation |                | 3-2  | -115               | -34                | -5                  | 26                                            | 14  | -1   |
|                    | Change of SSP2 to SSP3 urbanisation |                | 4-3  | -98                | -38                | -5                  | 31                                            | 14  | 1    |
|                    | Change of SSP2 to SSP3 population   |                | 5-4  | -98                | -51                | 6                   | 12                                            | -5  | 3    |

<sup>(1)</sup> Sub-Saharan Africa<sup>(2)</sup> Asia-North Africa-Latin America-Caribbean<sup>(3)</sup> North America-Europe-Former Soviet Union-Australia and New Zealand<sup>(4)</sup> 1971-2000 average<sup>(5)</sup> 2071-2100 average for RCP scenarios

Table S4: Simulated global burned area [ $10^6 \text{ km}^2$ ] by period, RCP and SSP scenario; for ESM ensemble and for each ESM separately<sup>(1)</sup>.

| Period    | RCP | Population | Urbanization | Ensemble | MPI-ESM-LR | CCSM4 | CSIRO-MK360 | EC-EARTH | CNRM-CM5 | GISS-E2-R | IPSL-MR | HADGEM2-ES |      |
|-----------|-----|------------|--------------|----------|------------|-------|-------------|----------|----------|-----------|---------|------------|------|
| 1971-2000 | -   | Historical | Historical   | 3.43     | 3.50       | 3.41  | 3.44        | 3.44     | 3.45     | 3.40      | 3.39    | 3.41       |      |
|           |     | SSP5       | SSP5         | 3.16     | 3.18       | 3.10  | 3.21        | 3.04     | 3.10     | 2.92      | 3.30    | 3.40       |      |
|           |     | SSP2       | SSP5         | 3.05     | 3.07       | 3.00  | 3.08        | 2.92     | 2.99     | 2.82      | 3.20    | 3.30       |      |
|           |     | 4.5        | SSP2         | SSP2     | 2.89       | 2.91  | 2.83        | 2.91     | 2.79     | 2.82      | 2.67    | 3.03       | 3.12 |
|           |     |            | SSP2         | SSP3     | 2.74       | 2.76  | 2.68        | 2.76     | 2.65     | 2.70      | 2.54    | 2.87       | 2.96 |
| 2071-2100 | -   | SSP3       | SSP3         | 2.60     | 2.62       | 2.55  | 2.61        | 2.51     | 2.56     | 2.40      | 2.71    | 2.82       |      |
|           |     | SSP5       | SSP5         | 3.42     | 3.54       | 3.42  | 3.46        | 3.27     | 3.27     | 3.06      | 3.63    | 3.75       |      |
|           |     | SSP2       | SSP5         | 3.32     | 3.42       | 3.32  | 3.36        | 3.17     | 3.16     | 2.96      | 3.51    | 3.64       |      |
|           |     | 8.5        | SSP2         | SSP2     | 3.16       | 3.24  | 3.19        | 3.19     | 3.01     | 3.03      | 2.82    | 3.36       | 3.48 |
|           |     |            | SSP2         | SSP3     | 3.02       | 3.09  | 3.06        | 3.03     | 2.88     | 2.89      | 2.70    | 3.20       | 3.32 |
|           |     |            | SSP3         | SSP3     | 2.88       | 2.95  | 2.92        | 2.87     | 2.73     | 2.76      | 2.58    | 3.05       | 3.17 |

<sup>(1)</sup>Numbers are shown in blue when future burned area is lower than recent.

Table S5: Effect of modifications to SIMFIRE on selected results, using MPI-ESM-LR climate model output

| Simulations                                          | Period    | Scenario   | Globe                                          |     | Areas with pop. dens. > 100/km <sup>2</sup>    |     | Areas with fire frequency > 0.01/yr |     |
|------------------------------------------------------|-----------|------------|------------------------------------------------|-----|------------------------------------------------|-----|-------------------------------------|-----|
|                                                      |           |            | Burned area [10 <sup>6</sup> km <sup>2</sup> ] |     | Burned area [10 <sup>3</sup> km <sup>2</sup> ] |     | Inhabitants [Mio.]                  |     |
| incr. at low pop. dens. <sup>(1)</sup><br>– standard | 1901-1930 | historical | -0.19                                          | 0%  | 0.0                                            | 0%  | 0                                   | 0%  |
|                                                      | 1971-2000 |            | -0.16                                          | 0%  | -0.4                                           | 0%  | 0                                   | 0%  |
|                                                      | 2071-2100 | RCP4.5     | -0.18                                          | 0%  | -0.2                                           | 0%  | -1                                  | 0%  |
|                                                      |           | RCP8.5     | -0.20                                          | 0%  | 0.1                                            | 0%  | 1                                   | 0%  |
| MCD45 <sup>(2)</sup> – standard                      | 1901-1930 | historical | -0.34                                          | -6% | 7.6                                            | 16% | -10                                 | -6% |
|                                                      | 1971-2000 |            | -0.23                                          | -2% | 42.9                                           | 25% | -7                                  | -2% |
|                                                      | 2071-2100 | RCP4.5     | -0.17                                          | 12% | 65.3                                           | 28% | 71                                  | 12% |
|                                                      |           | RCP8.5     | -0.26                                          | 11% | 58.6                                           | 24% | 68                                  | 11% |

<sup>(1)</sup> Assuming increasing effect of population density on burned area below 0.1 inhabitants / km<sup>2</sup>.

<sup>(2)</sup> SIMFIRE optimised against MODIS MCD45 global burned area product instead of GFED3.

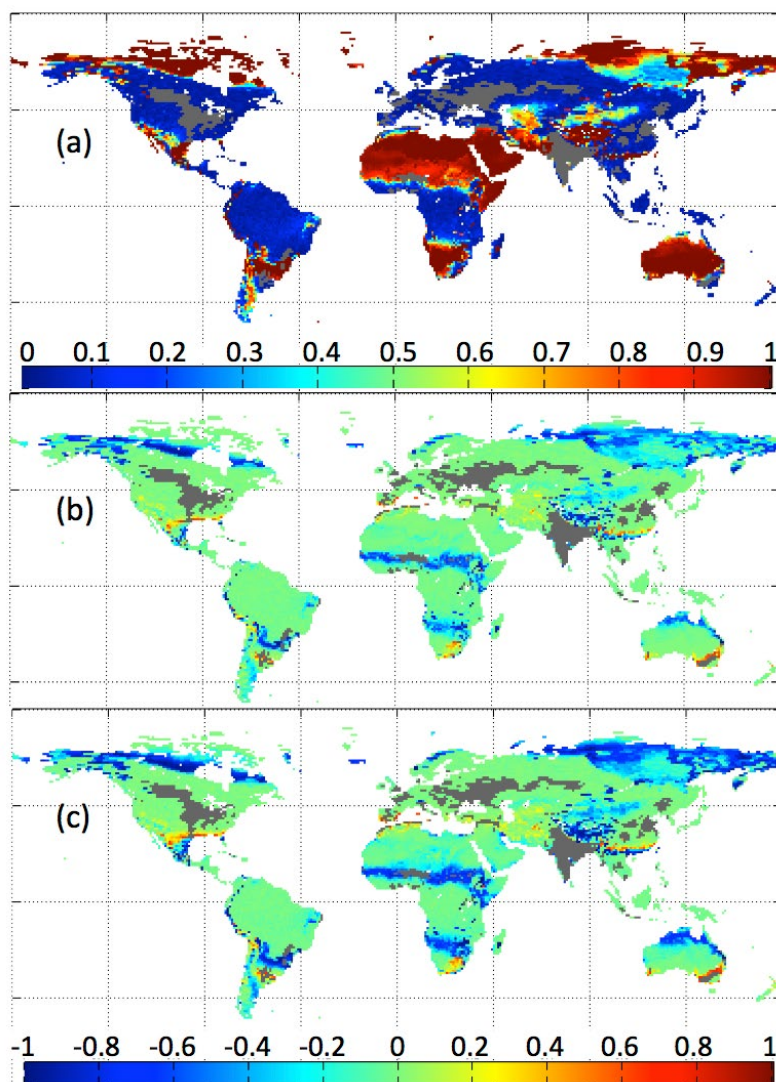

Figure S1: (a) Ensemble average of herbaceous fraction 1971-2000; (b) change in herbaceous fraction to 2071-2100 for RCP4.5, and (c) for RCP8.5. Grey areas excluded as dominated by agriculture.

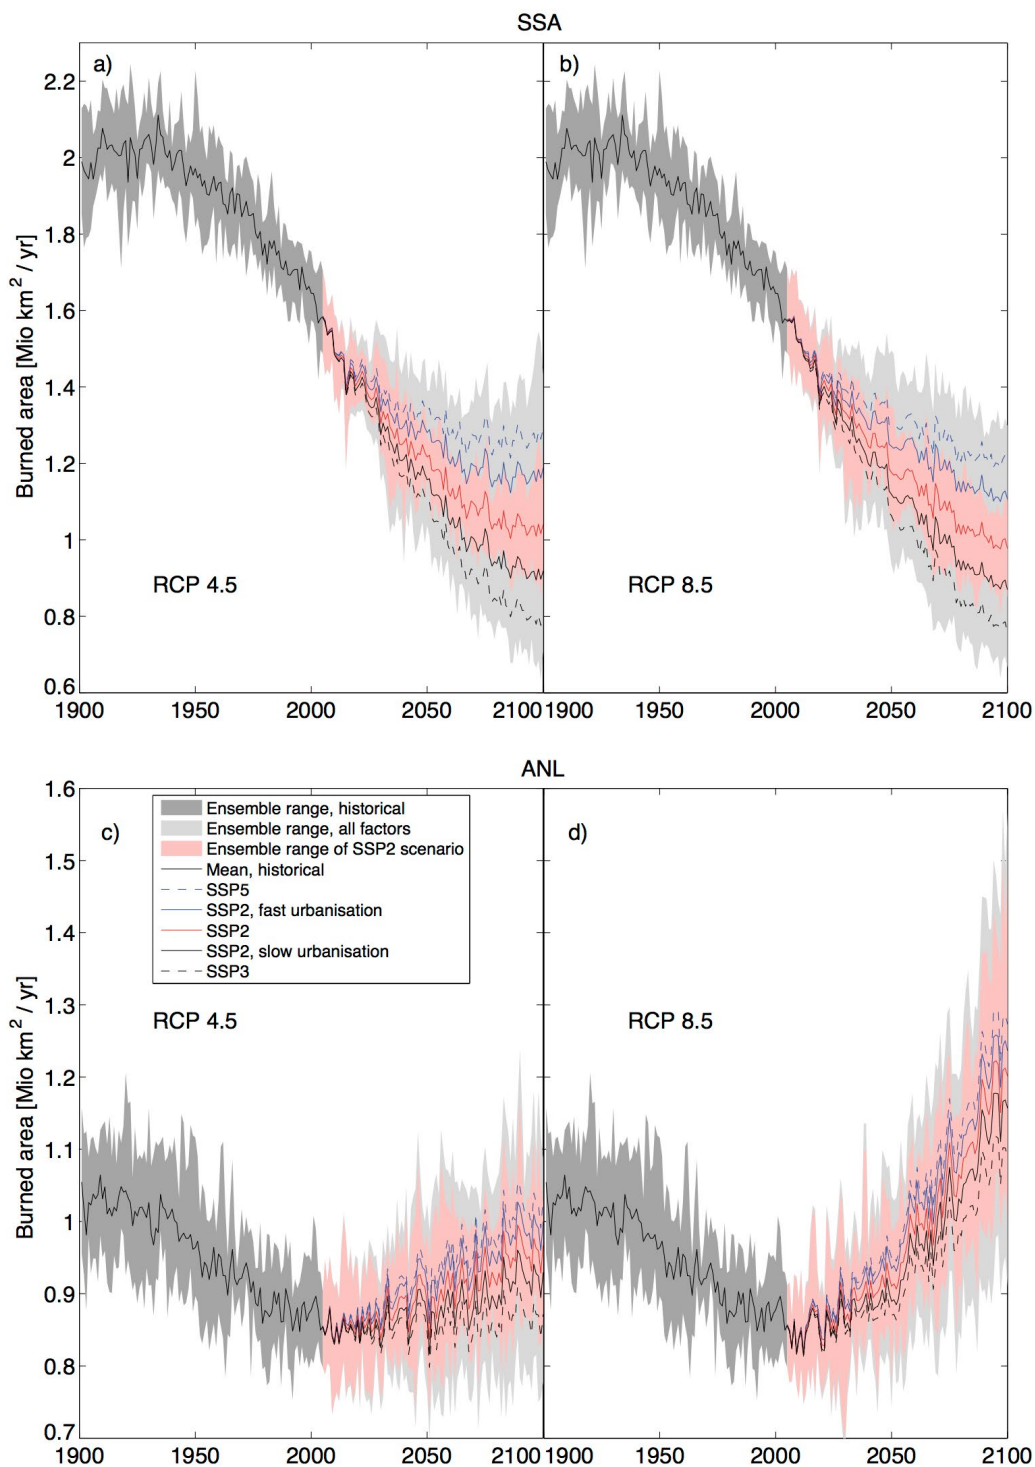

Figure S2: Ensemble mean and range of simulated burned area for Sub-Saharan Africa (a, b: SSA) and Asia-North Africa-Latin America and Caribbean (c, d: ANL), for RCP4.5 (a, c) and RCP8.5 (b, d).

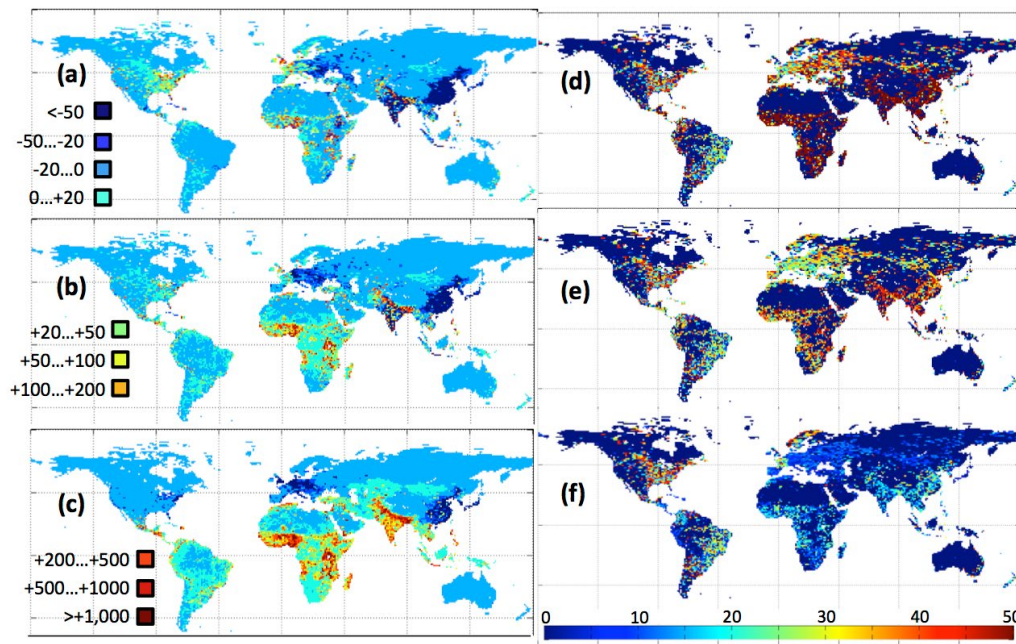

Figure S3: Absolute change in population density in people/km<sup>2</sup> (a-c) and change in percentage of urban population (d-f) between 2000 and 2100. (a, d) SSP5, (b, e) SSP2, (c, f) SSP3.



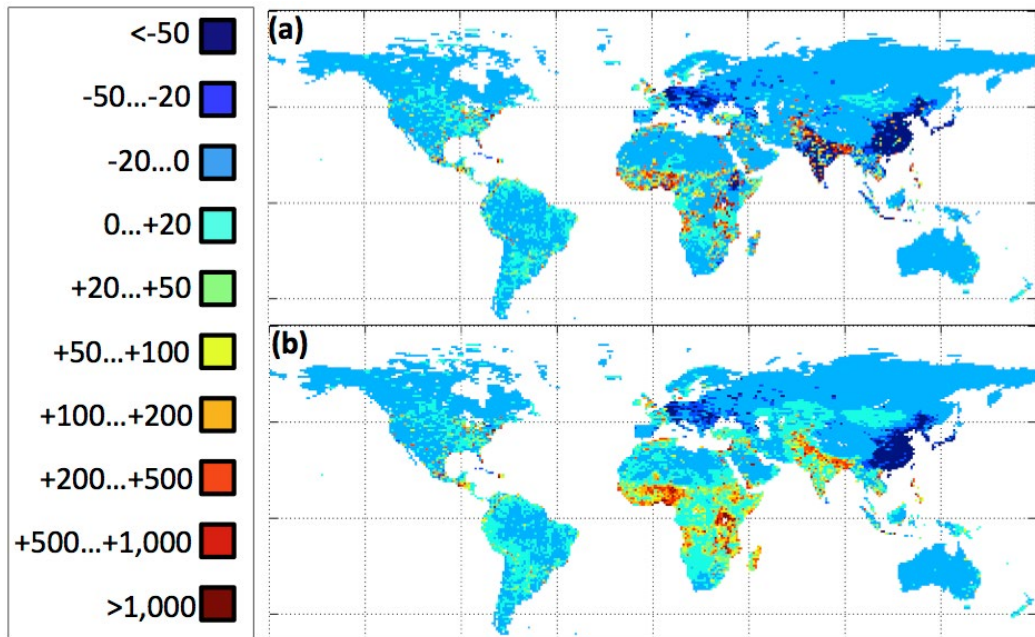

Figure S4: Change in population density from 2000 to 2100 in people per km<sup>2</sup> for SSP2 combined with (a) fast urbanization, (b) slow urbanisation.

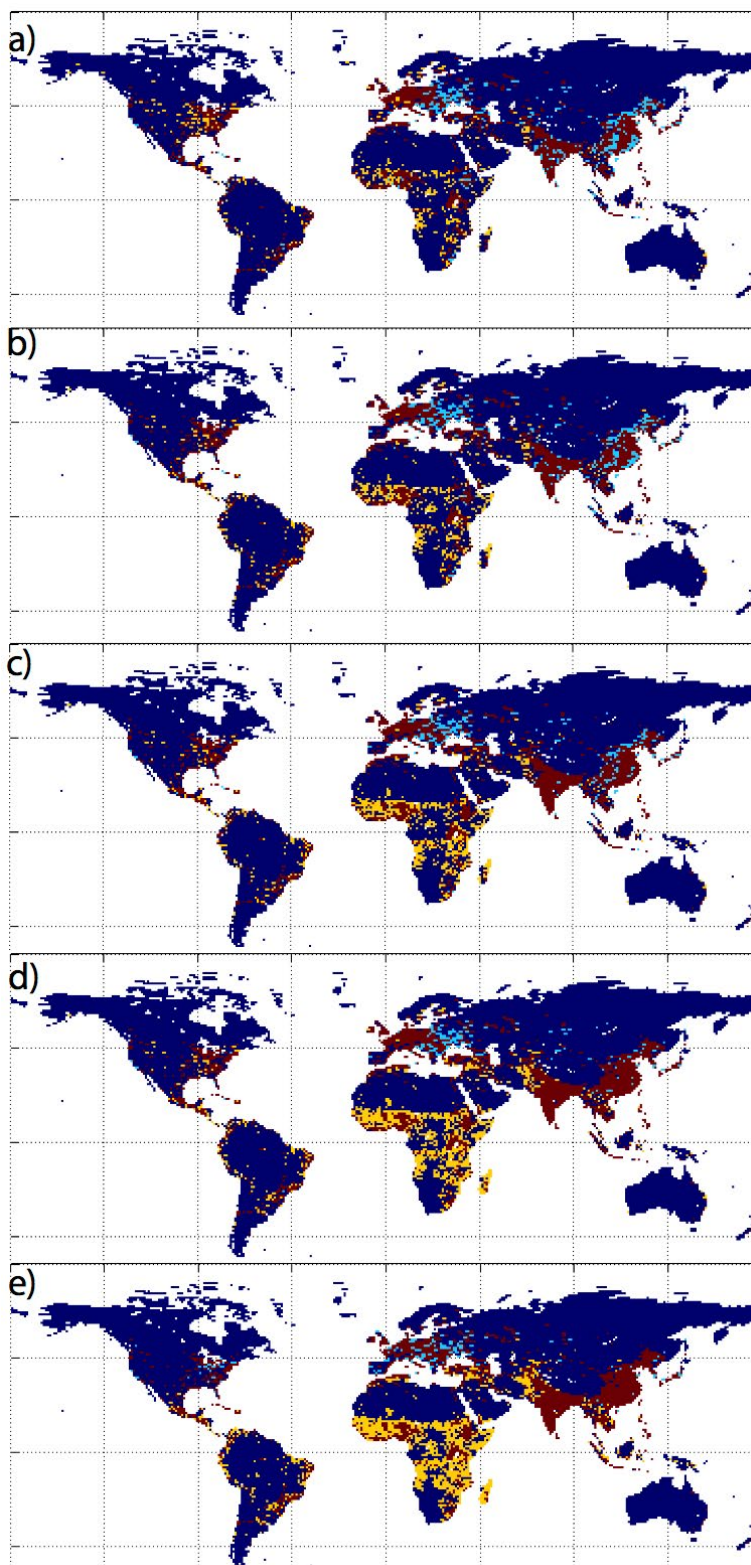

Figure S5: Densely populated areas ( $> 30$  inhabitants/km<sup>2</sup>) in 1971-2000 and 2071-2100 (dark red), new densely populated areas in 2071-2100 (yellow), and densely populated areas only in 1971-2000 (light blue). a) SSP5, b) SSP2 with fast urbanisation, c) SSP2, d) SSP2 with slow urbanisation, e) SSP3.

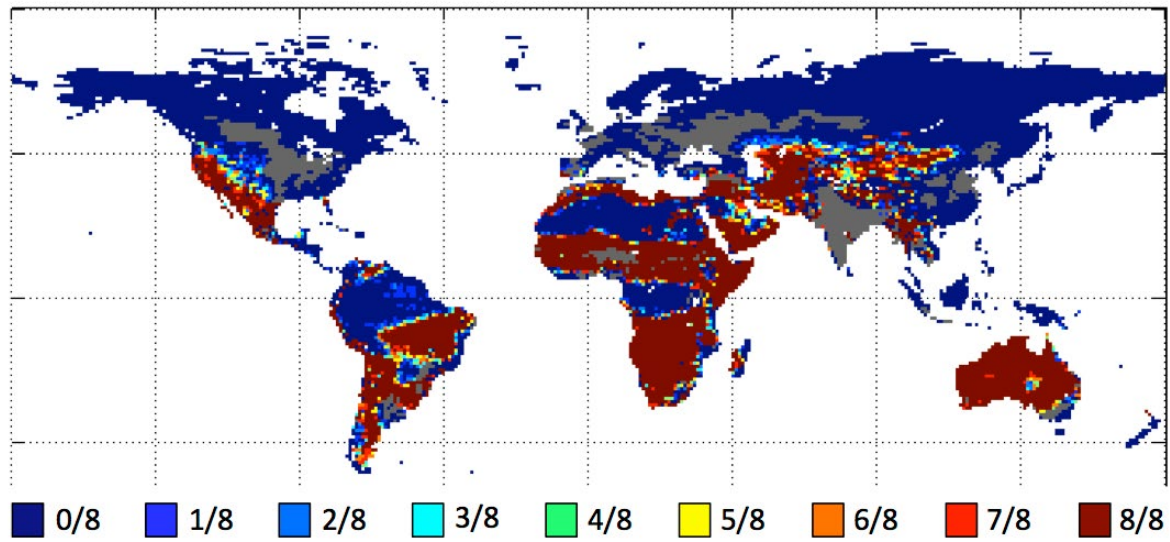

Figure S6: Fraction of ensemble members simulating grid cells as fire prone (fire frequency > 0.01/yr). Grey areas excluded as dominated by cropland.

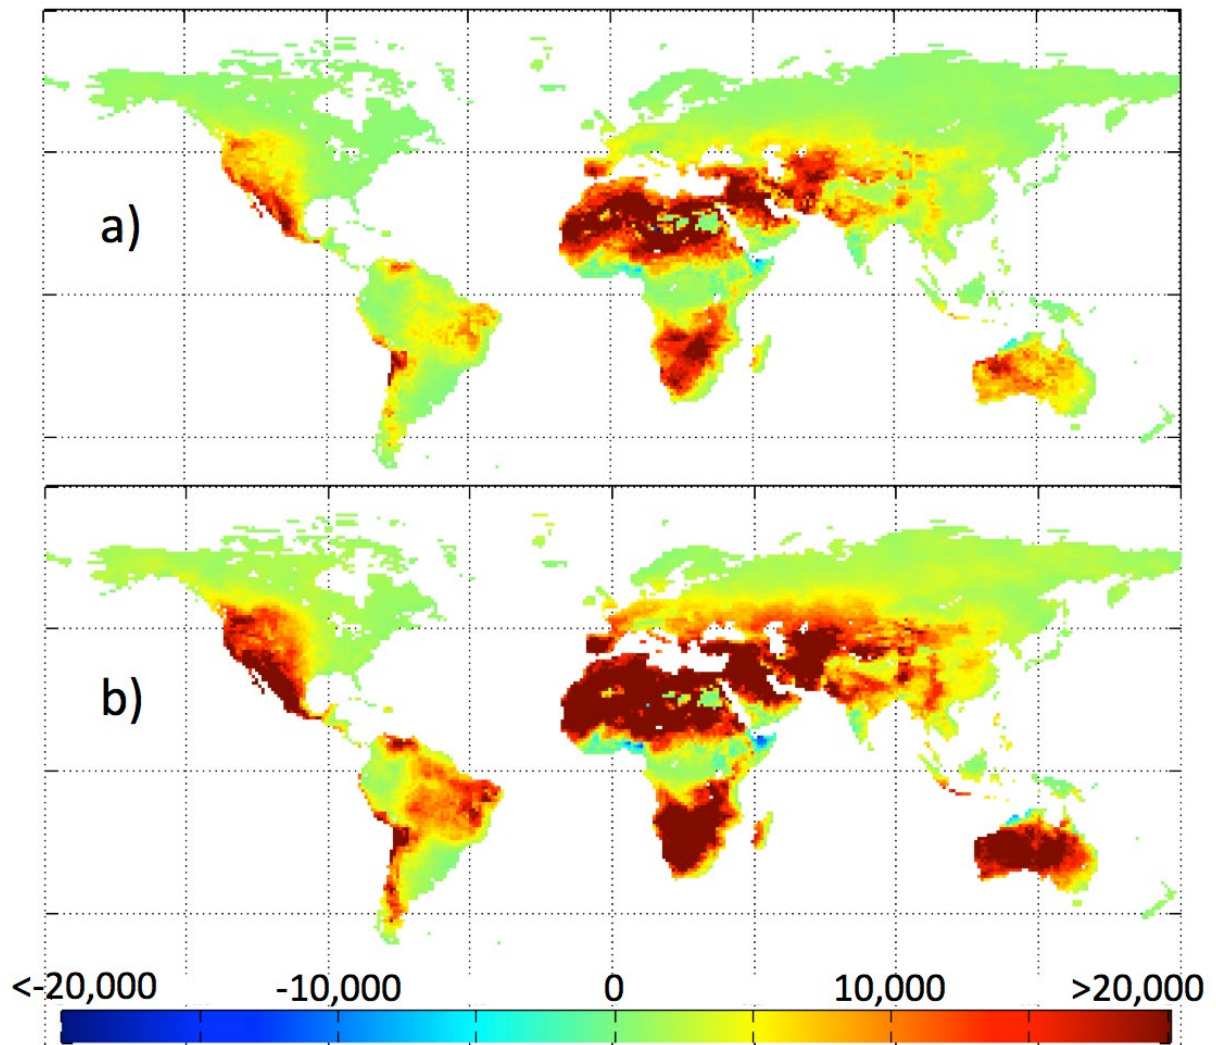

Figure S7: Change in average annual maximum Nesterov Index for ensemble mean from 1971-2000 to 2071-2100. a) RCP4.5; b) RCP8.5.



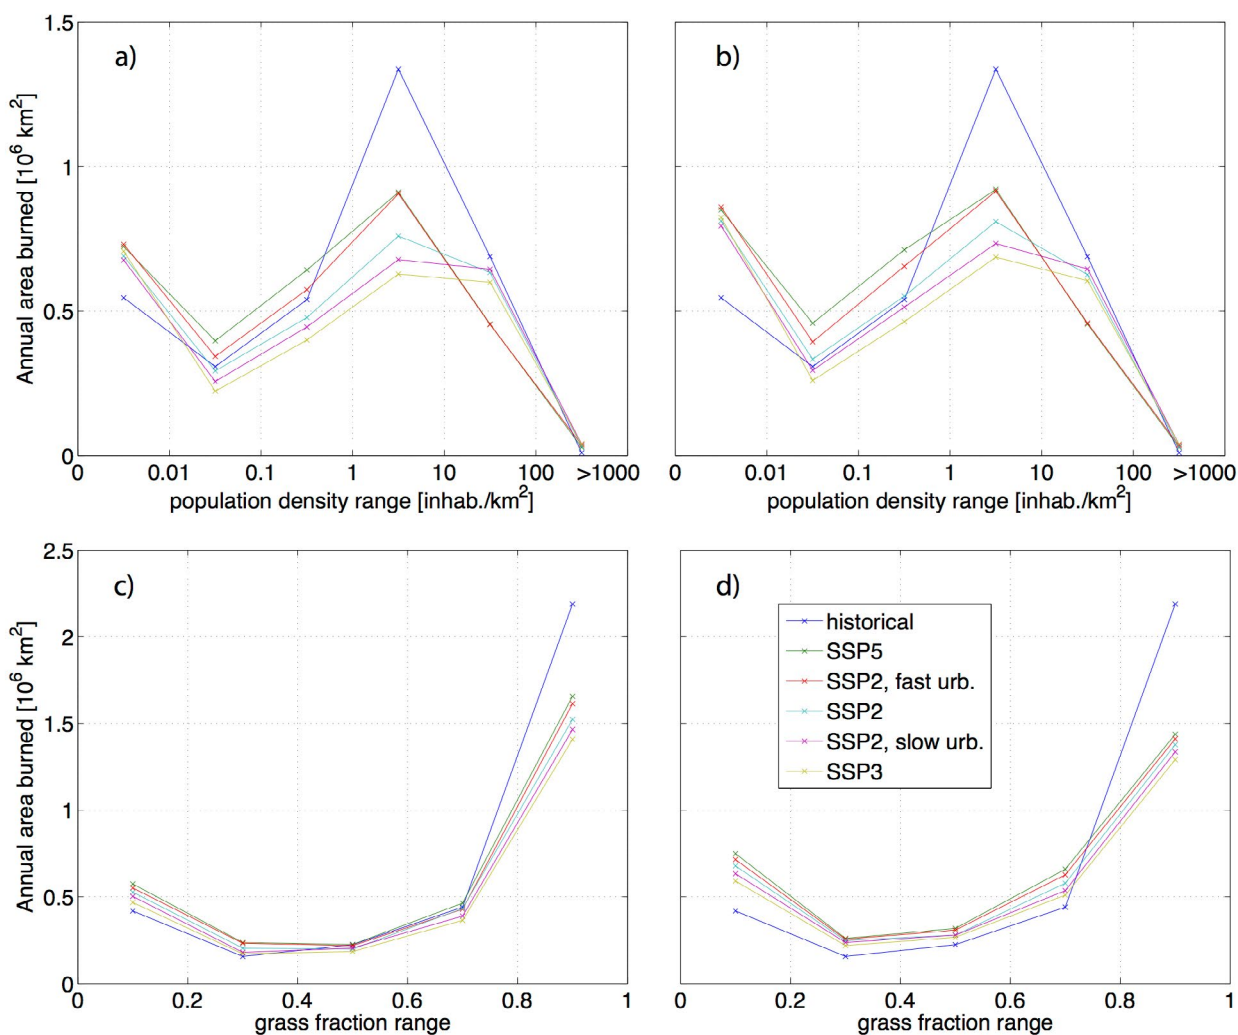

Figure S8: Histograms of burned area by ranges of population density (a, b), or by ranges of grass fraction of total vegetation (c,d) for historical period (1971-2000), and for different SSP population and urbanisation scenarios for the period 2071-2100. Ensemble averages for RCP4.5 (a, c) or RCP8.5 (b, d).

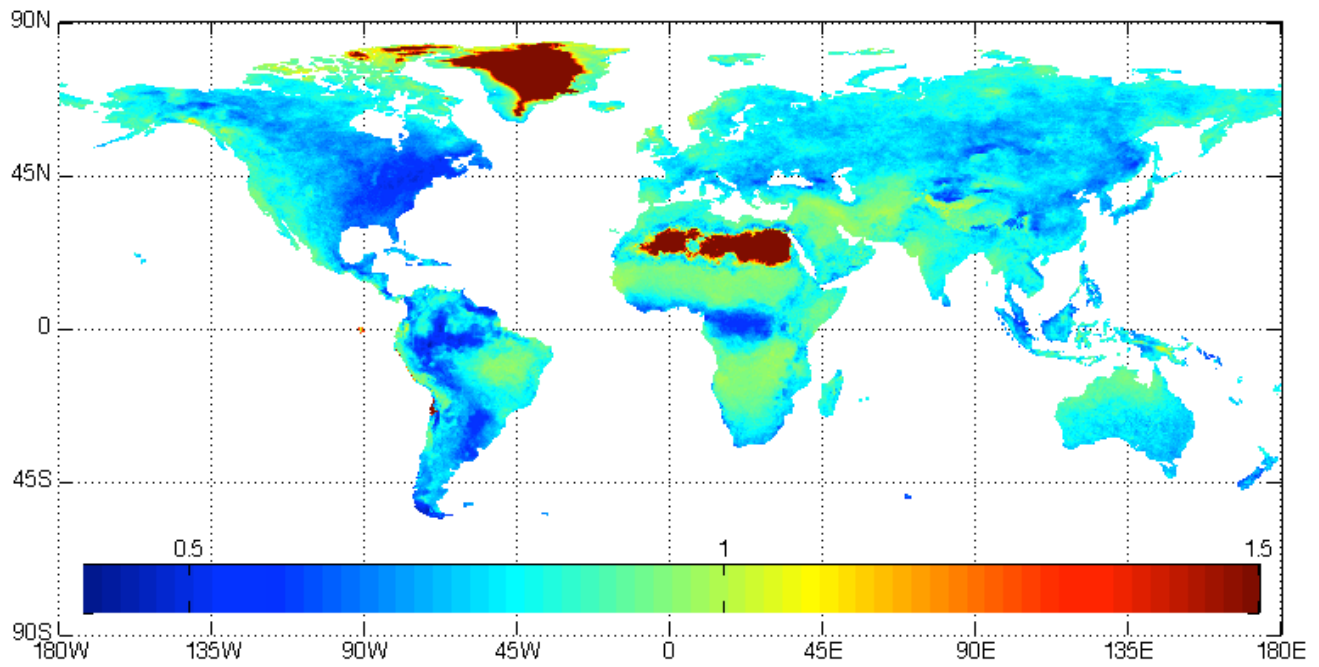

Figure S9. Mean ratio of observation-based divided by generated annual maximum Nesterov Index.

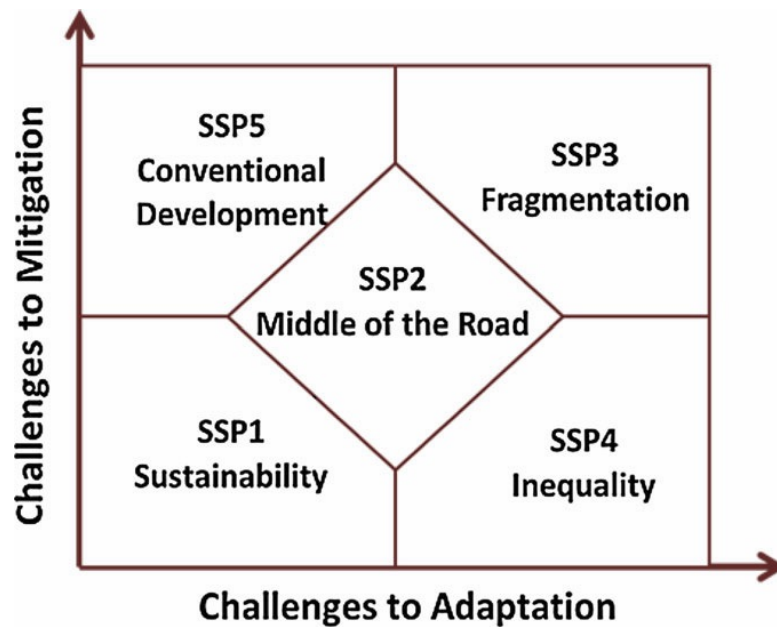

Figure S10. The Shared Socioeconomic Pathways as a means of identifying challenges to confronting climate change. Source: Jiang (2014) [Ref. 19].
